# Supplementary figures and images for: Calcium‐/Calmodulin‐Dependent Protein Kinase II (CaMKII) Inhibition Induces Learning and Memory Impairment and Apoptosis
Source: Hindawi journal article supplement (doi:10.1155/2021/4635054), 2021-01-01

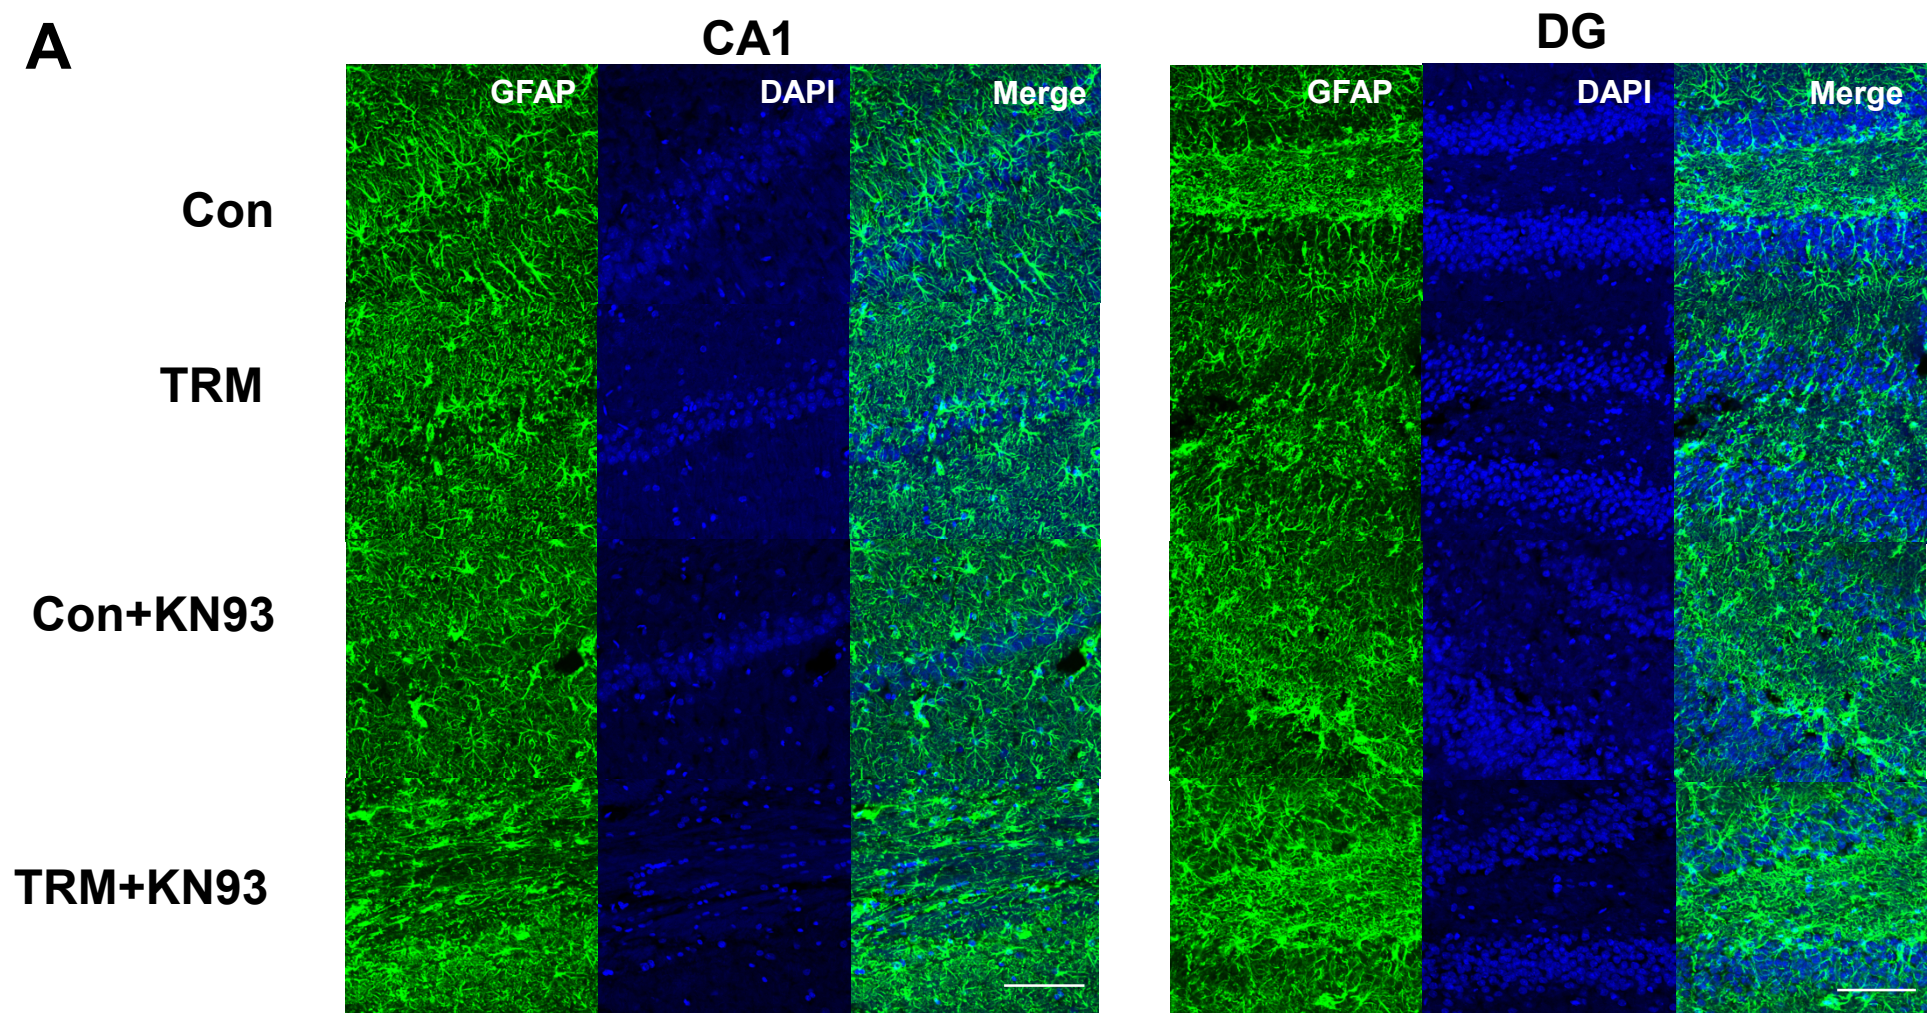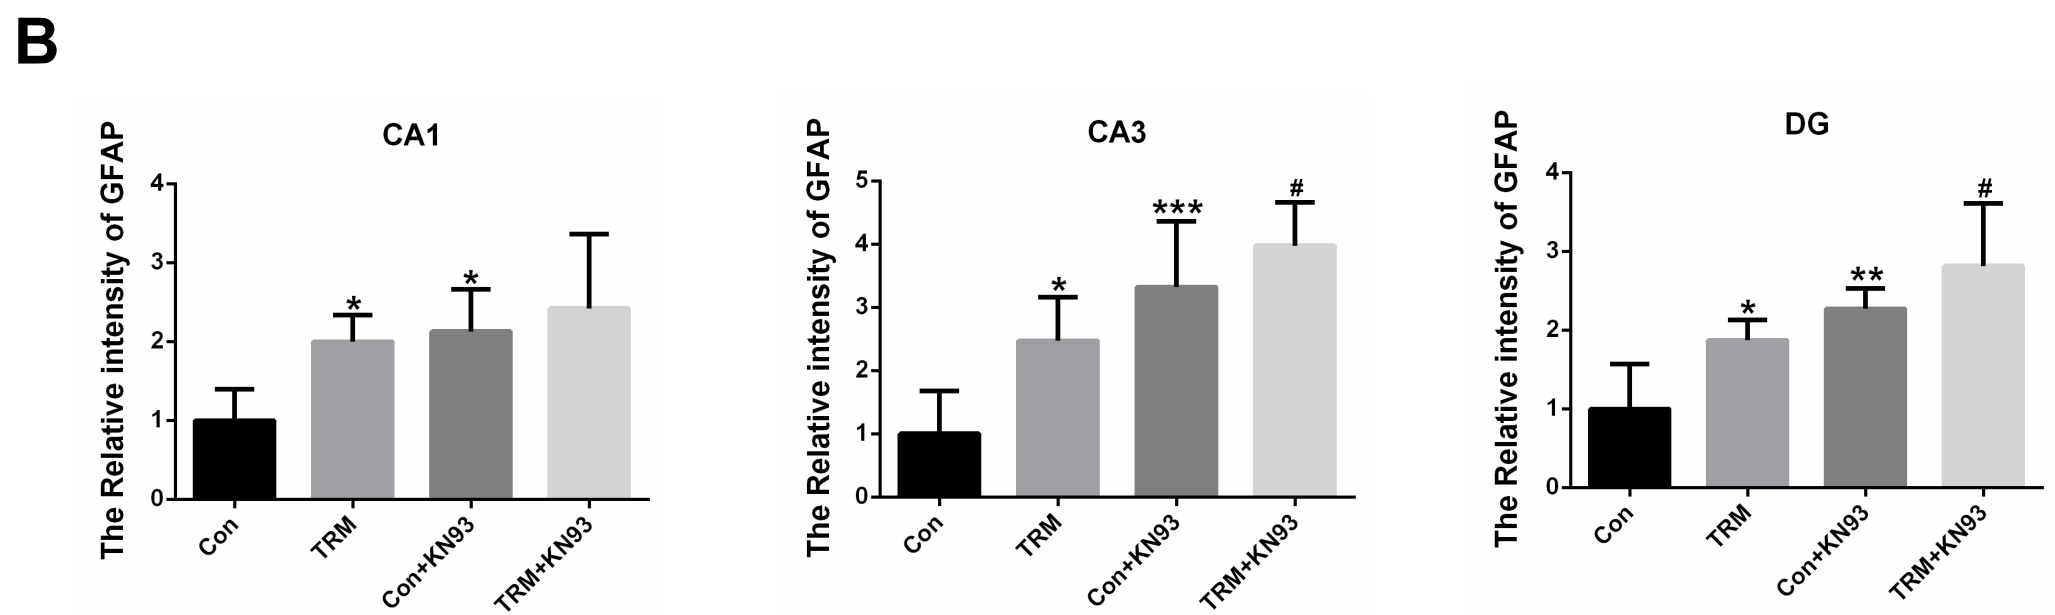

Figure S1

Supplement: f1 [file 4635054.f1.zip]
